# Supplementary material for: Layer-specific lipid signatures in the human subventricular zone demonstrated by imaging mass spectrometry
Source: PubMed Central journal article supplement (PMC5803191; doi:10.1038/s41598-018-20793-4), 2018-02-07
Supplement: 41598_2018_20793_MOESM1_ESM.pdf [file 41598_2018_20793_MOESM1_ESM.pdf]

# Supplementary Materials for

## **Layer-specific lipid signatures in the human subventricular zone demonstrated by imaging mass spectrometry**

Mandana Hunter, Nicholas J. Demarais, Richard L.M. Faull, Angus C. Grey  
and Maurice A. Curtis\*

\*Corresponding author email: [m.curtis@auckland.ac.nz](mailto:m.curtis@auckland.ac.nz)

## Supplementary Methods

**Liquid chromatography–tandem mass spectrometry (LC–MS/MS).** Tissue was sectioned from four cases for analysis of lipid content by LC–MS/MS, transferred cold into sterile glass vials, weighed and flash frozen in liquid nitrogen. Lipid extraction was performed according to a modified method of Bligh and Dyer<sup>1</sup> with the use of dichloromethane (Sigma-Aldrich, St Louis, MO). Extraction of lipids was effected by vortexing for 20 s in 190  $\mu$ L methanol, after which 320  $\mu$ L dichloromethane was added and samples vortexed again for 20 s prior to the addition of 120  $\mu$ L of water. The samples were vortexed again for 10 s then allowed to equilibrate for 10 min at room temperature before centrifugation at 8000 g for 10 min at 10°C. The lower, lipid-rich dichloromethane fraction was then isolated and the solvent evaporated to dryness under vacuum. Samples were reconstituted in 300  $\mu$ L acetonitrile/2-propanol/H<sub>2</sub>O (65:30:5 v/v/v). The samples were analysed by ultra-high pressure liquid chromatography–MS/MS using an Accela 1250 Pump coupled to a Q Exactive Orbitrap mass spectrometer (Thermo Fisher Scientific, Waltham, MA) operating in heated electrospray ionisation mode. The column and samples were maintained at temperatures of 45°C and 4°C, respectively. Injection volume was 5  $\mu$ L. Chromatographic separations were performed using an Accucore C18 150 x 2.1 mm, 1.6  $\mu$ m solid core column (Thermo Fisher Scientific, Waltham, MA). Mobile phases were acetonitrile/H<sub>2</sub>O (60:40, v/v) + 0.1% formic acid + 10 mM ammonium formate (Solvent C) and isopropanol/acetonitrile (90:10, v/v) + 0.1% formic acid + 10 mM ammonium formate (Solvent D). Reversed-phase LC was conducted and a flow rate of 0.26 mL.min<sup>-1</sup> was applied with a gradient elution of 32% to 97% solvent D over 21 min. Centroid MS scans were acquired in the mass range of 133.4–2000 m/z using the Orbitrap mass spectrometer with mass resolution  $\Delta$ M of 70,000 (full width at half maximum, FWHM, as defined at m/z 200), automatic gain control of 3e6, injection time of 100 ms, sheath gas flow rate of 25 units, auxiliary gas flow rate of 15 units, sweep gas flow rate of 0 units, capillary temperature of 250°C, S-lens radiofrequency 50% and heater temperature 350°C. Spray voltage was 3.5 kV for negative ions and 3.1 kV for positive ions. Parallel reaction monitoring acquisition was performed with a mass resolution of 17.5, automatic gain control of 2e4, injection time of 100 ms, isolation window of 2.0 m/z and normalised collision energy of 30%, 60% and 90% with combined MS/MS spectra resulting. Parent ion assignments were made using LipidSearch software (Thermo Fisher Scientific, Waltham, MA).

1. Bligh, E. G. & Dyer, W. J. A rapid method of total lipid extraction and purification. *Can. J. Biochem. Physiol.* **37**, 911–917 (1959).

## Supplementary Figures

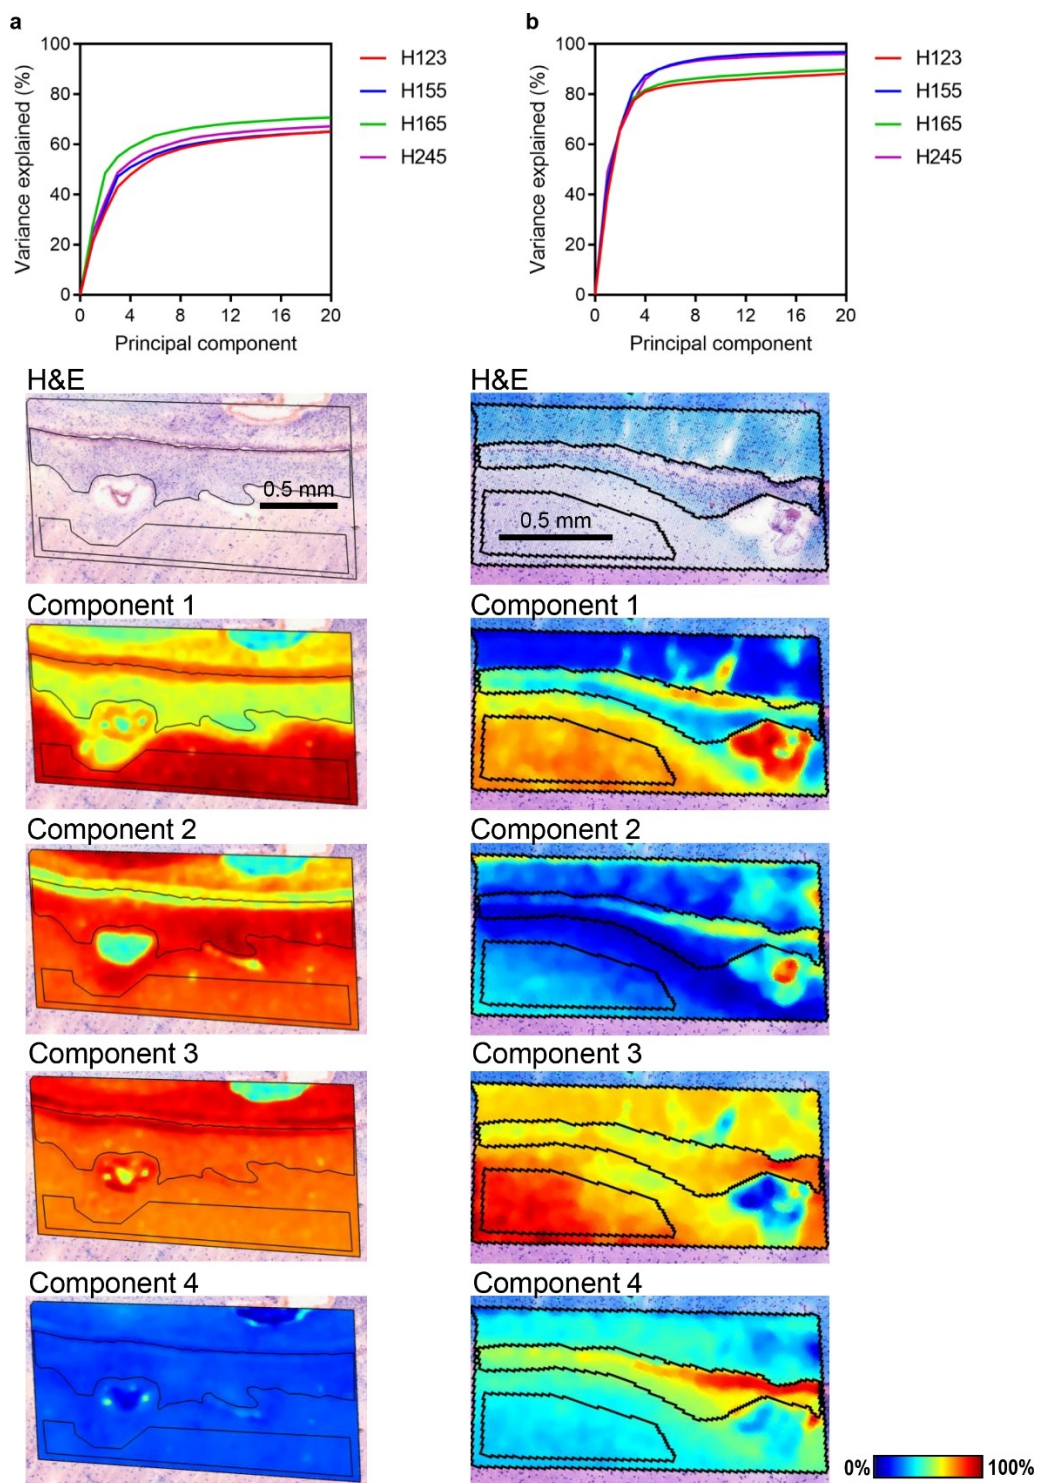

**Figure S1.** Principal component analysis of mass spectra within individual sections. Cumulative variance explained by principal components (PCs) and heat maps of the first four PCs in a representative case (H155) in positive (a) and negative (b) ionisation modes are shown.



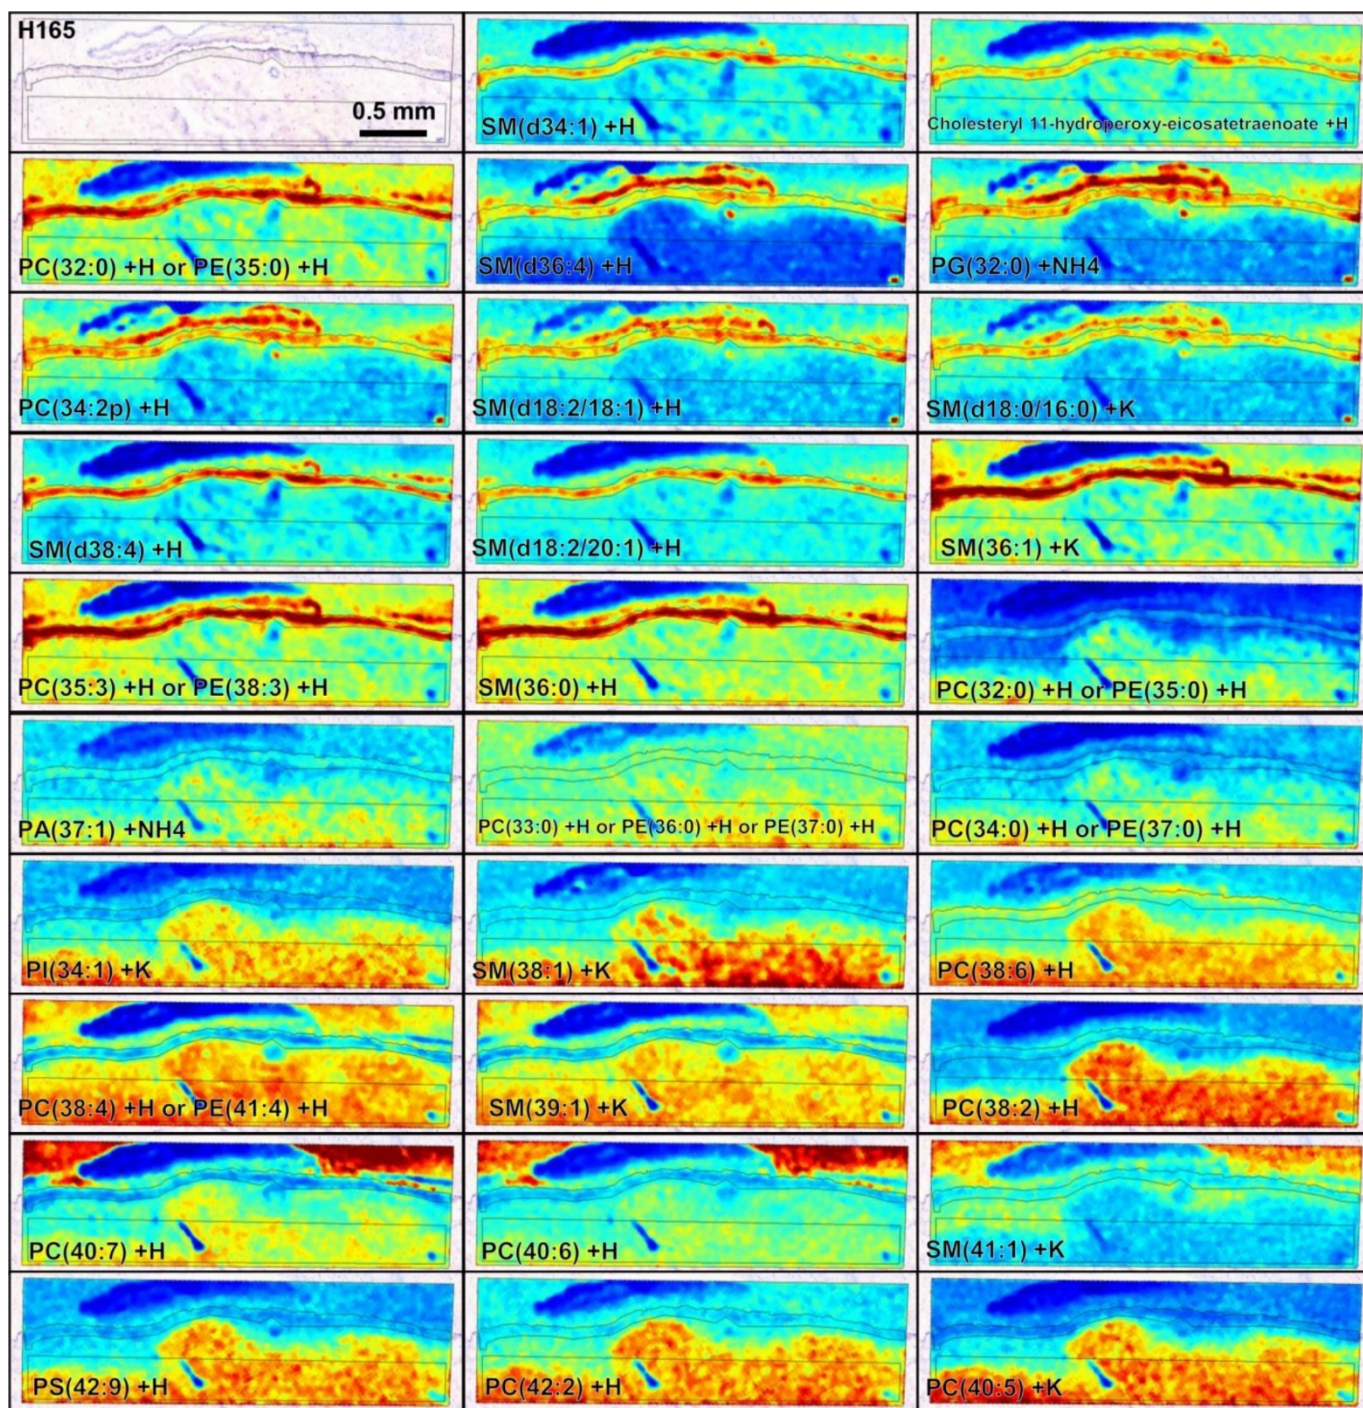

0% 100%

**Figure S2.** Ion intensity maps for select species that showed differential abundance in the SVZ compared to the CN in positive ion detection mode.



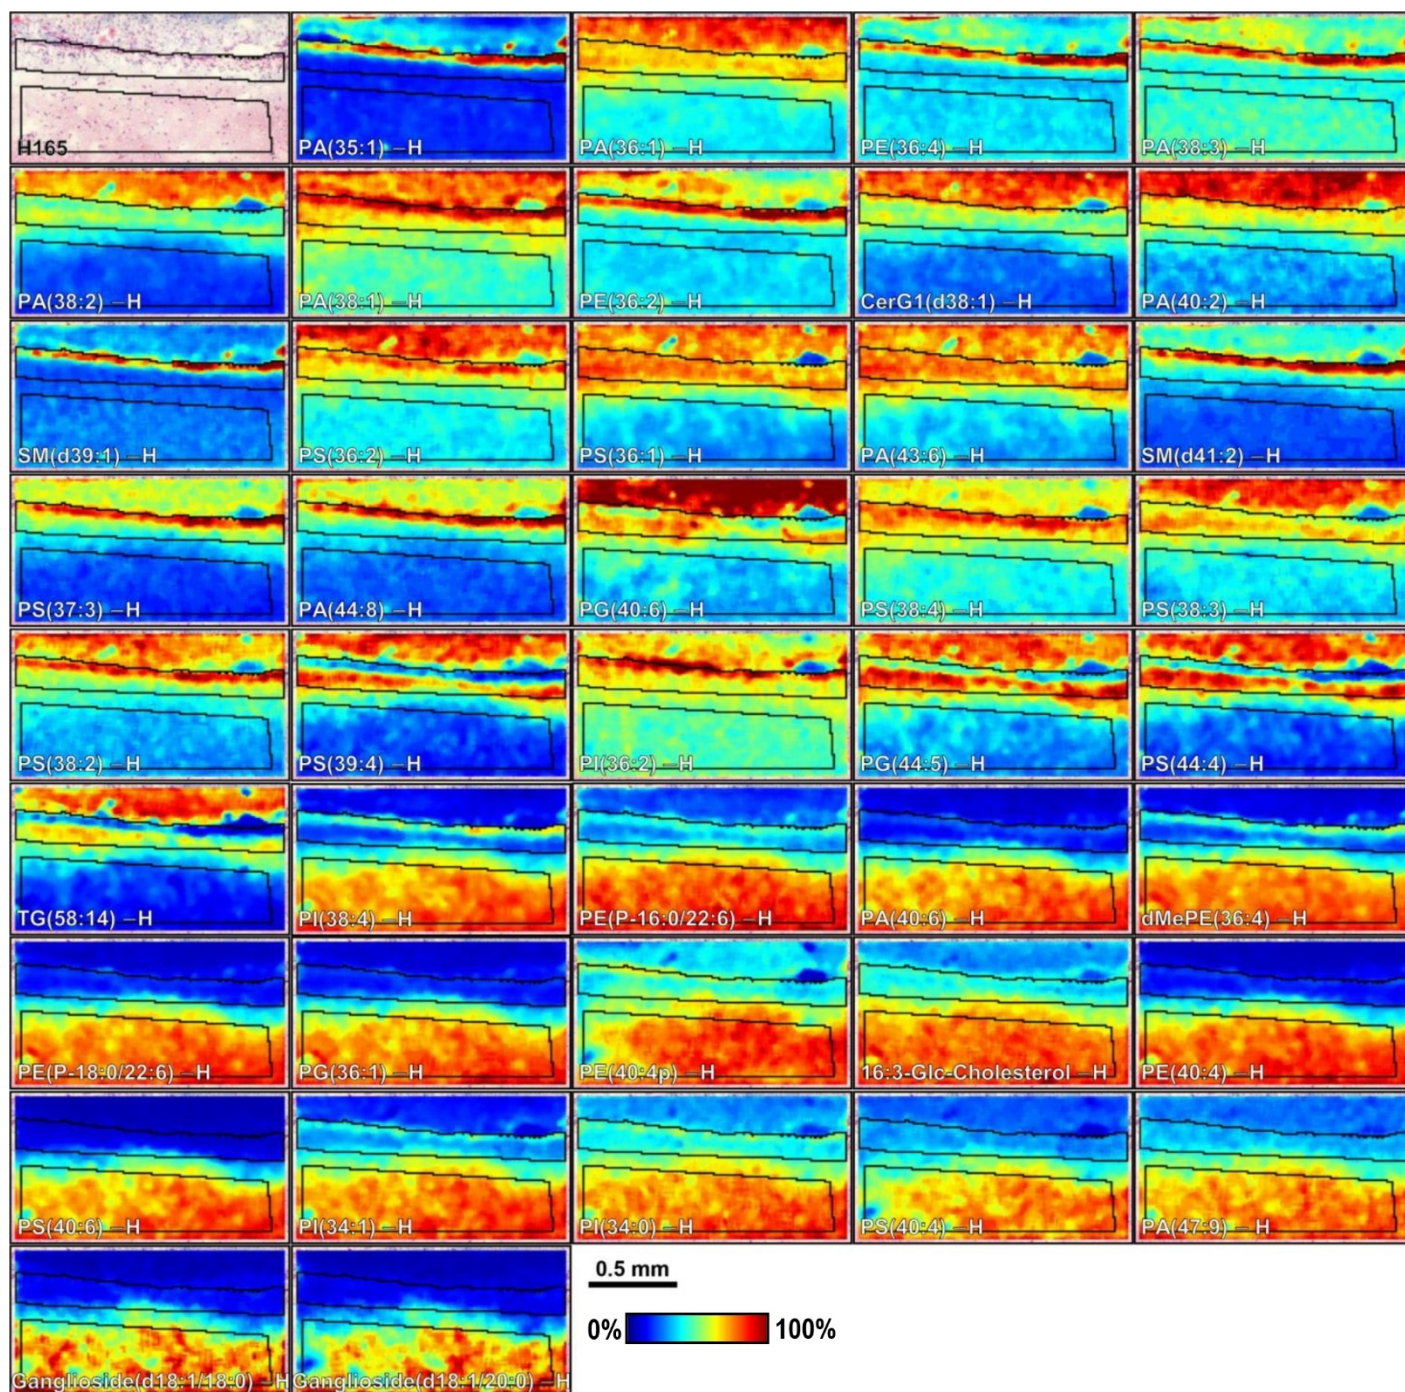

**Figure S3.** Ion intensity maps for select species that showed differential abundance in the SVZ compared to the CN in negative ion detection mode.

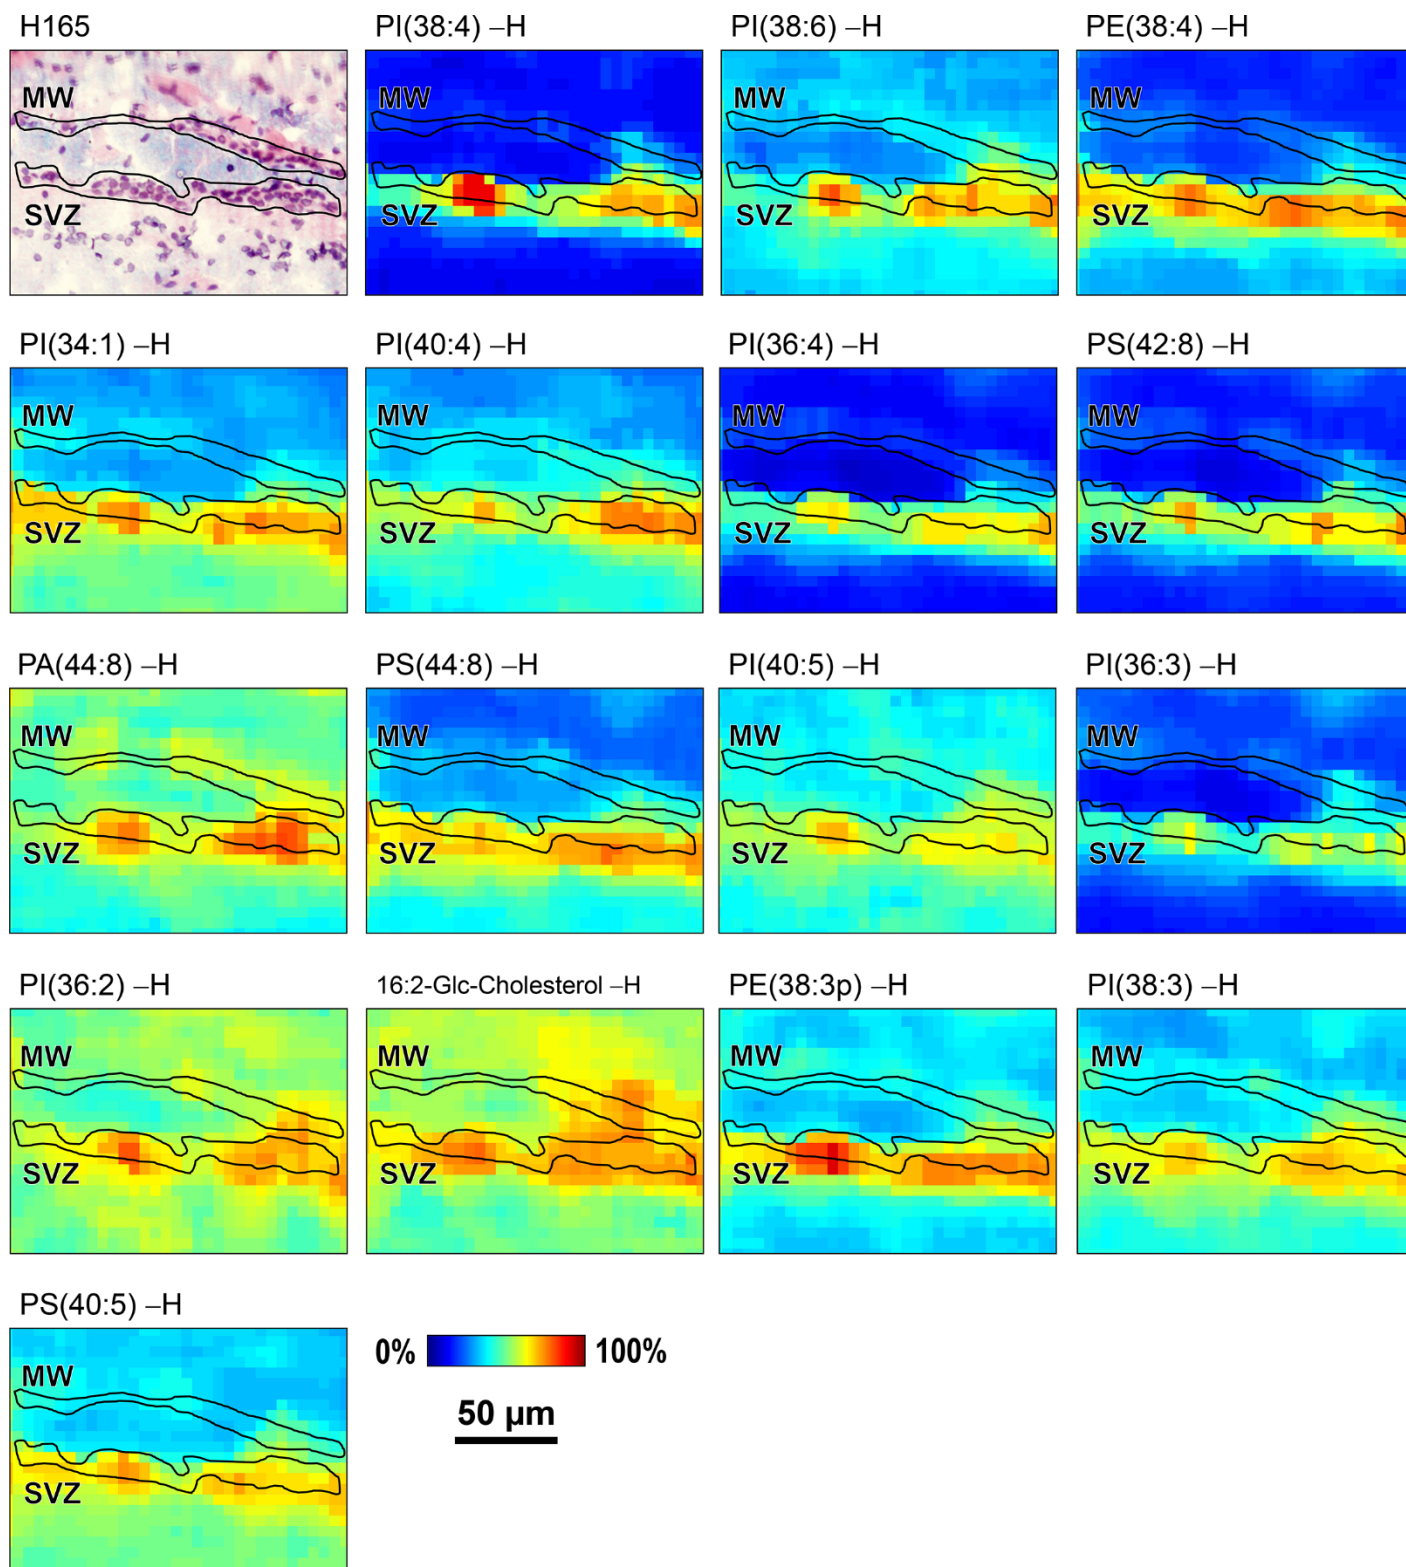

**Figure S4.** Ion intensity maps for lipids identified to the ependymal layer, comparing intensity in the ependyma of the SVZ (i.e. lateral wall of the ventricle) and the medial wall (MW) of the ventricle in a representative case.

## Supplementary Tables

**Table S1.** Lipid mass signals in positive ionisation mode that show higher abundance in the subventricular zone relative to the caudate nucleus. Co-localisation coefficients (Pearson  $r$ ), areas under the ROC curve (AUC-ROC) and SVZ/CN signal abundance ratios are expressed as mean  $\pm$  standard error of the mean for four cases. TOF obs.  $m/z$  and FT-ICR obs.  $m/z$  refer to the experimentally observed  $m/z$  for the corresponding analyte per MALDI-TOF and FT-ICR, respectively. FT-ICR error denotes the difference (in ppm) between the observed accurate mass the predicted  $m/z$  of the assignment.

| Assignment                                       | TOF obs. $m/z$ | FT-ICR obs. $m/z$ | Predicted $m/z$ | FT-ICR error (ppm) | Co-localisation ( $r$ ) | AUC-ROC         | Abundance (SVZ/CN) |
|--------------------------------------------------|----------------|-------------------|-----------------|--------------------|-------------------------|-----------------|--------------------|
| SM(d36:4) +H                                     | 725.6          | 725.561           | 725.559         | 3                  | 0.70 $\pm$ 0.09         | 0.93 $\pm$ 0.05 | 3.07 $\pm$ 0.52    |
| PG(33:0) +NH <sub>4</sub>                        | 754.6          | 754.595           | 754.597         | 3                  | 0.68 $\pm$ 0.03         | 0.91 $\pm$ 0.02 | 1.90 $\pm$ 0.08    |
| SM(d38:4) +H                                     | 753.6          | 753.592           | 753.591         | 1                  | 0.64 $\pm$ 0.05         | 0.87 $\pm$ 0.04 | 1.95 $\pm$ 0.11    |
| SM(36:1) +K or PE-Cer(39:1) +K or PE-Cer(382) +K | 769.6          | 769.567           | 769.562         | 6                  | 0.64 $\pm$ 0.05         | 0.87 $\pm$ 0.04 | 1.91 $\pm$ 0.25    |
| PC(35:3) +H or PE(38:3) +H                       | 770.6          | 770.57            | 770.569         | 1                  | 0.61 $\pm$ 0.03         | 0.86 $\pm$ 0.02 | 1.80 $\pm$ 0.19    |
| SM(d44:5) +H                                     | 835.7          | 835.672           | 835.669         | 4                  | 0.60 $\pm$ 0.06         | 0.87 $\pm$ 0.03 | 2.05 $\pm$ 0.27    |
| PC(34:2p) +H                                     | 742.6          | 742.575           | 742.575         | 0                  | 0.59 $\pm$ 0.10         | 0.87 $\pm$ 0.06 | 2.29 $\pm$ 0.24    |
| PG(32:0) +NH <sub>4</sub>                        | 726.6          | 726.564           | 726.564         | 0                  | 0.58 $\pm$ 0.13         | 0.86 $\pm$ 0.06 | 2.66 $\pm$ 0.44    |
| SM(d34:1) +H                                     | 703.6          | 703.578           | 703.575         | 4                  | 0.56 $\pm$ 0.16         | 0.84 $\pm$ 0.11 | 2.36 $\pm$ 0.51    |
| SM(36:0) +H                                      | 771.6          | 771.574           | 771.578         | 5                  | 0.50 $\pm$ 0.06         | 0.80 $\pm$ 0.04 | 1.54 $\pm$ 0.07    |
| PC(32:0) +H or PE(35:0) +H                       | 720.8          | 720.594           | 720.59          | 6                  | 0.47 $\pm$ 0.06         | 0.78 $\pm$ 0.05 | 1.68 $\pm$ 0.11    |
| SM(d18:0/16:0) +K                                | 743.6          | 743.541           | 743.546         | 7                  | 0.45 $\pm$ 0.16         | 0.78 $\pm$ 0.10 | 2.17 $\pm$ 0.41    |
| Cholesteryl 11-hydroperoxy-eicosatetraenoate +H  | 705.8          | 705.584           | 705.582         | 3                  | 0.44 $\pm$ 0.04         | 0.78 $\pm$ 0.03 | 1.59 $\pm$ 0.04    |
| SM(d18:2/18:1) +H                                | 727.6          | 727.576           | 727.575         | 1                  | 0.43 $\pm$ 0.16         | 0.77 $\pm$ 0.10 | 2.42 $\pm$ 0.44    |
| PC(32:1) +H or PE-NMe(34:1) +H or PE(35:1) +H    | 732.6          | 732.558           | 732.554         | 5                  | 0.40 $\pm$ 0.14         | 0.74 $\pm$ 0.08 | 1.42 $\pm$ 0.16    |
| PE(36:4) +H                                      | 740.5          | 740.524           | 740.522         | 3                  | 0.36 $\pm$ 0.06         | 0.73 $\pm$ 0.04 | 1.68 $\pm$ 0.08    |
| SM(d38:5) +H                                     | 751.6          | 751.576           | 751.575         | 1                  | 0.36 $\pm$ 0.04         | 0.73 $\pm$ 0.02 | 1.47 $\pm$ 0.05    |
| PC(36:4e) +H or PE(39:3p) +H                     | 768.6          | 768.593           | 768.59          | 4                  | 0.30 $\pm$ 0.04         | 0.69 $\pm$ 0.02 | 1.24 $\pm$ 0.03    |

**Table S2.** Lipid mass signals in negative ionisation mode that show higher abundance in the subventricular zone relative to the caudate nucleus. Co-localisation coefficients (Pearson  $r$ ), areas under the ROC curve (AUC-ROC) and SVZ/CN signal abundance ratios are expressed as mean  $\pm$  standard error of the mean for four cases. TOF obs.  $m/z$  and FT-ICR obs.  $m/z$  refer to the experimentally observed  $m/z$  for the corresponding analyte per MALDI-TOF and FT-ICR, respectively. FT-ICR error denotes the difference (in ppm) between the observed accurate mass the predicted  $m/z$  of the assignment.

| Assignment                      | TOF obs. $m/z$ | FT-ICR obs. $m/z$ | Predicted $m/z$ | FT-ICR error (ppm) | Co-localisation ( $r$ ) | AUC-ROC         | Abundance (SVZ/CN) |
|---------------------------------|----------------|-------------------|-----------------|--------------------|-------------------------|-----------------|--------------------|
| PE(36:2p) -H or dMePE(34:2p) -H | 726.5          | 726.547           | 726.544         | 4                  | 0.90 $\pm$ 0.01         | 1.00 $\pm$ 0.00 | 4.81 $\pm$ 0.78    |
| PA(38:2) -H                     | 727.6          | 727.531           | 727.528         | 4                  | 0.87 $\pm$ 0.01         | 0.99 $\pm$ 0.00 | 2.99 $\pm$ 0.41    |
| PA(43:6) -H                     | 789.5          | 789.551           | 789.544         | 9                  | 0.86 $\pm$ 0.01         | 0.99 $\pm$ 0.00 | 2.80 $\pm$ 0.35    |
| PS(36:1) -H                     | 788.7          | 788.548           | 788.545         | 4                  | 0.83 $\pm$ 0.04         | 0.98 $\pm$ 0.01 | 3.14 $\pm$ 0.49    |
| PE(34:1p) -H or dMePE(32:1p) -H | 700.5          | 700.531           | 700.529         | 3                  | 0.82 $\pm$ 0.02         | 0.99 $\pm$ 0.00 | 2.05 $\pm$ 0.16    |
| PA(36:1) -H                     | 701.6          | 701.515           | 701.513         | 3                  | 0.82 $\pm$ 0.02         | 0.98 $\pm$ 0.01 | 2.07 $\pm$ 0.18    |
| dMePE(34:1p) -H or PE(36:1p) -H | 728.7          | 728.563           | 728.56          | 4                  | 0.81 $\pm$ 0.03         | 0.98 $\pm$ 0.01 | 2.41 $\pm$ 0.27    |
| CerG1(d38:1) -H                 | 754.7          | 754.616           | 754.62          | 5                  | 0.81 $\pm$ 0.03         | 0.98 $\pm$ 0.01 | 2.70 $\pm$ 0.32    |
| PS(37:3) -H                     | 798.8          | 798.532           | 798.529         | 4                  | 0.78 $\pm$ 0.02         | 0.98 $\pm$ 0.01 | 3.90 $\pm$ 0.47    |
| PS(38:4) -H                     | 810.6          | 810.533           | 810.529         | 5                  | 0.74 $\pm$ 0.02         | 0.95 $\pm$ 0.01 | 1.85 $\pm$ 0.09    |
| PS(38:3) -H                     | 812.8          | 812.549           | 812.545         | 5                  | 0.72 $\pm$ 0.03         | 0.92 $\pm$ 0.02 | 1.73 $\pm$ 0.03    |
| SM(d41:2) -H                    | 797.7          | 797.658           | 797.654         | 5                  | 0.71 $\pm$ 0.02         | 0.99 $\pm$ 0.01 | 4.29 $\pm$ 0.95    |
| PA(40:2) -H                     | 755.6          | 755.563           | 755.56          | 4                  | 0.71 $\pm$ 0.01         | 0.93 $\pm$ 0.01 | 1.94 $\pm$ 0.07    |
| PS(38:2) -H                     | 814.7          | 814.564           | 814.56          | 5                  | 0.70 $\pm$ 0.03         | 0.93 $\pm$ 0.02 | 2.20 $\pm$ 0.08    |
| PS(44:4) -H                     | 894.7          | 894.629           | 894.623         | 7                  | 0.69 $\pm$ 0.05         | 0.87 $\pm$ 0.04 | 2.37 $\pm$ 0.13    |
| PA(44:8) -H                     | 799.6          | 799.535           | 799.528         | 9                  | 0.68 $\pm$ 0.03         | 0.97 $\pm$ 0.01 | 3.24 $\pm$ 0.27    |
| PA(38:1) -H                     | 729.6          | 729.547           | 729.544         | 4                  | 0.68 $\pm$ 0.01         | 0.92 $\pm$ 0.01 | 1.70 $\pm$ 0.05    |
| PS(36:2) -H                     | 786.5          | 786.532           | 786.529         | 4                  | 0.66 $\pm$ 0.09         | 0.89 $\pm$ 0.06 | 1.95 $\pm$ 0.27    |
| PI(36:2) -H                     | 861.6          | 861.554           | 861.55          | 5                  | 0.66 $\pm$ 0.04         | 0.93 $\pm$ 0.03 | 1.89 $\pm$ 0.20    |
| PG(44:5) -H                     | 879.6          | 879.612           | 879.612         | 0                  | 0.65 $\pm$ 0.06         | 0.86 $\pm$ 0.04 | 1.84 $\pm$ 0.12    |
| PG(40:6) -H                     | 807.6          | 807.553           | 807.555         | 2                  | 0.64 $\pm$ 0.03         | 0.89 $\pm$ 0.02 | 1.67 $\pm$ 0.08    |
| TG(58:14) -H                    | 917.7          | 917.663           | 917.667         | 4                  | 0.63 $\pm$ 0.02         | 0.83 $\pm$ 0.02 | 2.35 $\pm$ 0.07    |
| PE(36:2) -H                     | 742.7          | 742.543           | 742.539         | 5                  | 0.63 $\pm$ 0.01         | 0.88 $\pm$ 0.02 | 1.97 $\pm$ 0.16    |
| PS(39:4) -H                     | 824.8          | 824.548           | 824.545         | 4                  | 0.61 $\pm$ 0.06         | 0.84 $\pm$ 0.04 | 2.59 $\pm$ 0.10    |
| PE(36:4) -H                     | 724.6          | 724.531           | 724.529         | 3                  | 0.55 $\pm$ 0.03         | 0.81 $\pm$ 0.03 | 1.56 $\pm$ 0.03    |
| PA(35:1) -H                     | 687.6          | 687.5             | 687.497         | 4                  | 0.54 $\pm$ 0.01         | 0.83 $\pm$ 0.03 | 2.63 $\pm$ 0.14    |
| PA(38:3) -H                     | 725.7          | 725.516           | 725.513         | 4                  | 0.44 $\pm$ 0.06         | 0.73 $\pm$ 0.04 | 1.38 $\pm$ 0.01    |
| SM(d39:1) -H                    | 771.7          | 771.642           | 771.639         | 4                  | 0.42 $\pm$ 0.02         | 0.71 $\pm$ 0.04 | 2.34 $\pm$ 0.43    |



**Table S3.** Lipid mass signals in positive ionisation mode that show lower abundance in the subventricular zone relative to the caudate nucleus. Co-localisation coefficients (Pearson  $r$ ), areas under the ROC curve (AUC-ROC) and SVZ/CN signal abundance ratios are expressed as mean  $\pm$  standard error of the mean for four cases. TOF obs.  $m/z$  and FT-ICR obs.  $m/z$  refer to the experimentally observed  $m/z$  for the corresponding analyte per MALDI-TOF and FT-ICR, respectively. FT-ICR error denotes the difference (in ppm) between the observed accurate mass the predicted  $m/z$  of the assignment.

| Assignment                                | TOF obs. $m/z$ | FT-ICR obs. $m/z$ | Predicted $m/z$ | FT-ICR error (ppm) | Co-localisation ( $r$ ) | AUC-ROC         | Abundance (SVZ/CN) |
|-------------------------------------------|----------------|-------------------|-----------------|--------------------|-------------------------|-----------------|--------------------|
| PC(32:0) +H or PE(35:0) +H                | 734.6          | 734.573           | 734.569         | 5                  | -0.66 $\pm$ 0.08        | 0.07 $\pm$ 0.02 | 0.48 $\pm$ 0.02    |
| PC(40:6) +H                               | 834.6          | 834.606           | 834.601         | 6                  | -0.58 $\pm$ 0.07        | 0.11 $\pm$ 0.24 | 0.45 $\pm$ 0.04    |
| PC(34:0) +H or PE(37:0) +H                | 762.6          | 762.607           | 762.601         | 8                  | -0.55 $\pm$ 0.06        | 0.13 $\pm$ 0.02 | 0.61 $\pm$ 0.03    |
| PC(38:4) +H or PE(41:4) +H                | 810.7          | 810.604           | 810.601         | 4                  | -0.52 $\pm$ 0.09        | 0.17 $\pm$ 0.05 | 0.64 $\pm$ 0.07    |
| PA(37:1) +NH <sub>4</sub>                 | 736.6          | 736.58            | 736.585         | 7                  | -0.51 $\pm$ 0.08        | 0.15 $\pm$ 0.04 | 0.52 $\pm$ 0.03    |
| PC(38:2) +H                               | 814.6          | 814.638           | 814.632         | 7                  | -0.50 $\pm$ 0.04        | 0.11 $\pm$ 0.21 | 0.48 $\pm$ 0.06    |
| PC(38:6) +H                               | 806.6          | 806.574           | 806.569         | 6                  | -0.49 $\pm$ 0.08        | 0.17 $\pm$ 0.03 | 0.60 $\pm$ 0.05    |
| PC(40:5) +K                               | 874.6          | 874.579           | 874.572         | 8                  | -0.48 $\pm$ 0.11        | 0.11 $\pm$ 0.28 | 0.43 $\pm$ 0.11    |
| SM(39:1) +K                               | 811.7          | 811.607           | 811.609         | 2                  | -0.48 $\pm$ 0.08        | 0.19 $\pm$ 0.05 | 0.64 $\pm$ 0.07    |
| PS(42:9) +H                               | 858.6          | 858.531           | 858.528         | 3                  | -0.42 $\pm$ 0.07        | 0.11 $\pm$ 0.26 | 0.51 $\pm$ 0.10    |
| PC(40:7) +H                               | 832.6          | 832.588           | 832.585         | 4                  | -0.41 $\pm$ 0.13        | 0.11 $\pm$ 0.23 | 0.62 $\pm$ 0.11    |
| SM(38:1) +K                               | 797.6          | 797.598           | 797.593         | 6                  | -0.39 $\pm$ 0.16        | 0.24 $\pm$ 0.12 | 0.67 $\pm$ 0.18    |
| PI(34:1) +K                               | 875.6          | 875.508           | 875.505         | 3                  | -0.35 $\pm$ 0.09        | 0.11 $\pm$ 0.29 | 0.54 $\pm$ 0.15    |
| PC(39:2p) +H                              | 812.7          | -                 | 812.653         | 2                  | -0.30 $\pm$ 0.02        | 0.11 $\pm$ 0.20 | 0.76 $\pm$ 0.01    |
| PC(33:0) +H or PE(36:0) +H or PE(37:0) +H | 748.6          | 748.589           | 748.585         | 5                  | -0.28 $\pm$ 0.03        | 0.31 $\pm$ 0.02 | 0.71 $\pm$ 0.03    |
| PC(42:2) +H                               | 870.6          | 870.7             | 870.695         | 6                  | -0.22 $\pm$ 0.04        | 0.11 $\pm$ 0.27 | 0.61 $\pm$ 0.04    |
| SM(41:1) +K                               | 839.7          | 839.641           | 839.64          | 1                  | -0.15 $\pm$ 0.02        | 0.11 $\pm$ 0.25 | 0.79 $\pm$ 0.02    |

**Table S4.** Lipid mass signals in negative ionisation mode that show lower abundance in the subventricular zone relative to the caudate nucleus. Co-localisation coefficients (Pearson  $r$ ), areas under the ROC curve (AUC-ROC) and SVZ/CN signal abundance ratios are expressed as mean  $\pm$  standard error of the mean for four cases. TOF obs.  $m/z$  and FT-ICR obs.  $m/z$  refer to the experimentally observed  $m/z$  for the corresponding analyte per MALDI-TOF and FT-ICR, respectively. FT-ICR error denotes the difference (in ppm) between the observed accurate mass the predicted  $m/z$  of the assignment.

| Assignment                                                                                                                                                             | TOF obs. $m/z$ | FT-ICR obs. $m/z$ | Predicted $m/z$ | FT-ICR error (ppm) | Co-localisation ( $r$ ) | AUC-ROC         | Abundance (SVZ/CN) |
|------------------------------------------------------------------------------------------------------------------------------------------------------------------------|----------------|-------------------|-----------------|--------------------|-------------------------|-----------------|--------------------|
| PC(37:6) -H or PE(40:6) -H                                                                                                                                             | 790.6          | 790.542           | 790.539         | 4                  | $-0.90 \pm 0.01$        | $0.00 \pm 0.00$ | $0.23 \pm 0.04$    |
| PE(P-18:0/22:6) -H                                                                                                                                                     | 774.7          | 774.548           | 774.544         | 5                  | $-0.89 \pm 0.01$        | $0.01 \pm 0.00$ | $0.30 \pm 0.04$    |
| PE(40:4) -H                                                                                                                                                            | 794.7          | 794.574           | 794.571         | 4                  | $-0.89 \pm 0.01$        | $0.01 \pm 0.00$ | $0.29 \pm 0.04$    |
| PA(40:6) -H                                                                                                                                                            | 747.6          | 747.5             | 747.497         | 4                  | $-0.87 \pm 0.01$        | $0.01 \pm 0.00$ | $0.33 \pm 0.05$    |
| PS(40:6) -H                                                                                                                                                            | 834.7          | 834.532           | 834.529         | 4                  | $-0.86 \pm 0.03$        | $0.01 \pm 0.01$ | $0.21 \pm 0.04$    |
| PG(36:1) -H                                                                                                                                                            | 775.6          | 775.551           | 775.55          | 1                  | $-0.82 \pm 0.07$        | $0.04 \pm 0.03$ | $0.33 \pm 0.05$    |
| PE(40:5) -H or dMePE(38:5) -H                                                                                                                                          | 792.6          | 792.547           | 792.555         | 10                 | $-0.82 \pm 0.06$        | $0.03 \pm 0.02$ | $0.34 \pm 0.03$    |
| PE(P-16:0/22:6) -H                                                                                                                                                     | 746.5          | 746.516           | 746.513         | 4                  | $-0.80 \pm 0.02$        | $0.03 \pm 0.01$ | $0.53 \pm 0.04$    |
| PS(40:4) -H                                                                                                                                                            | 838.8          | 838.565           | 838.56          | 6                  | $-0.79 \pm 0.01$        | $0.03 \pm 0.01$ | $0.46 \pm 0.04$    |
| GM1(d20:1-C/18:0) -H                                                                                                                                                   | 1573           | 1572.913          | 1572.901        | 8                  | $-0.76 \pm 0.05$        | $0.03 \pm 0.01$ | $0.26 \pm 0.03$    |
| PE(38:3) -H                                                                                                                                                            | 768.7          | 768.547           | 768.555         | 10                 | $-0.76 \pm 0.04$        | $0.05 \pm 0.02$ | $0.54 \pm 0.03$    |
| PI(38:4) -H                                                                                                                                                            | 885.6          | 885.554           | 885.55          | 5                  | $-0.75 \pm 0.04$        | $0.07 \pm 0.02$ | $0.51 \pm 0.06$    |
| PI(18:0) -H or 6-O-(1-O-stearoyl-sn-glycero-3-phosphono)-1D-myo-inositol -H                                                                                            | 599.5          | 599.322           | 599.32          | 3                  | $-0.75 \pm 0.02$        | $0.05 \pm 0.01$ | $0.54 \pm 0.06$    |
| 16:3-Glc-Cholesterol                                                                                                                                                   | 779.7          | 779.582           | 779.583         | 1                  | $-0.75 \pm 0.02$        | $0.06 \pm 0.01$ | $0.60 \pm 0.04$    |
| dMePE(38:3) -H or PE(40:3)-H                                                                                                                                           | 796.6          | 796.579           | 796.586         | 9                  | $-0.75 \pm 0.02$        | $0.05 \pm 0.01$ | $0.56 \pm 0.04$    |
| Fucalpa1-2Galbeta1-3(Fucalpa1-4)GlcNAcbeta1-3Galbeta1-4Glcbeta-Cer(d18:1/18:0) -H or Fucalpa1-2Galbeta1-4(Fucalpa1-3)GlcNAcbeta1-3Galbeta1-4Glcbeta-Cer(d18:1/18:0) -H | 1545.9         | 1545.883          | 1545.89         | 5                  | $-0.73 \pm 0.05$        | $0.05 \pm 0.02$ | $0.31 \pm 0.04$    |
| PA(47:9) -H                                                                                                                                                            | 839.6          | 839.567           | 839.56          | 8                  | $-0.73 \pm 0.04$        | $0.05 \pm 0.02$ | $0.49 \pm 0.04$    |
| PE(40:4p) -H                                                                                                                                                           | 778.8          | 778.579           | 778.576         | 4                  | $-0.73 \pm 0.01$        | $0.06 \pm 0.01$ | $0.61 \pm 0.02$    |
| dMePE(36:4) -H                                                                                                                                                         | 766.5          | 766.542           | 766.539         | 4                  | $-0.72 \pm 0.09$        | $0.09 \pm 0.05$ | $0.49 \pm 0.03$    |
| PI(34:1) -H                                                                                                                                                            | 835.6          | 835.536           | 835.534         | 2                  | $-0.72 \pm 0.07$        | $0.07 \pm 0.03$ | $0.55 \pm 0.03$    |
| GM1(d18:1-C/18:0) -H                                                                                                                                                   | 1544.8         | 1544.88           | 1544.869        | 7                  | $-0.72 \pm 0.06$        | $0.06 \pm 0.06$ | $0.31 \pm 0.04$    |
| PC(35:1) -H or PE(38:1) -H                                                                                                                                             | 772.6          | 772.589           | 772.586         | 4                  | $-0.72 \pm 0.03$        | $0.07 \pm 0.02$ | $0.63 \pm 0.02$    |
| Fucalpa1-2Galbeta1-3(Fucalpa1-4)GlcNAcbeta1-3Galbeta1-4Glcbeta-Cer(d18:1/20:0) -H or Fucalpa1-2Galbeta1-4(Fucalpa1-3)GlcNAcbeta1-3Galbeta1-4Glcbeta-Cer(d18:1/20:0) -H | 1573.9         | 1573.915          | 1573.921        | 4                  | $-0.69 \pm 0.11$        | $0.08 \pm 0.06$ | $0.30 \pm 0.07$    |
| PS(40:5) -H                                                                                                                                                            | 836.6          | 836.537           | 836.545         | 10                 | $-0.69 \pm 0.06$        | $0.08 \pm 0.02$ | $0.61 \pm 0.03$    |
| PI(34:0) -H                                                                                                                                                            | 837.7          | 837.555           | 837.55          | 6                  | $-0.68 \pm 0.04$        | $0.09 \pm 0.02$ | $0.61 \pm 0.04$    |

**Table S5.** Lipid mass signals co-localised with the ependymal layer. Co-localisation coefficients (Pearson  $r$ ) are expressed as mean  $\pm$  standard error of the mean for four cases. TOF obs.  $m/z$  and FT-ICR obs.  $m/z$  refer to the experimentally observed  $m/z$  for the corresponding analyte per MALDI-TOF and FT-ICR, respectively. FT-ICR error denotes the difference (in ppm) between the observed accurate mass the predicted  $m/z$  of the assignment.

| Assignment                      | TOF obs. $m/z$ | FT-ICR obs. $m/z$ | Predicted $m/z$ | FT-ICR error (ppm) | Co-localisation ( $r$ ) |
|---------------------------------|----------------|-------------------|-----------------|--------------------|-------------------------|
| PI(38:4) -H                     | 871.7          | 871.574           | 871.571         | 3                  | 0.74 $\pm$ 0.05         |
| PI(38:6) -H                     | 881.6          | 881.522           | 881.519         | 3                  | 0.71 $\pm$ 0.03         |
| PE(38:4) -H                     | 766.5          | 766.542           | 766.539         | 4                  | 0.58 $\pm$ 0.08         |
| PI(34:1) -H                     | 835.6          | 835.536           | 835.534         | 2                  | 0.57 $\pm$ 0.11         |
| PI(40:4) -H                     | 913.6          | 913.586           | 913.581         | 5                  | 0.57 $\pm$ 0.05         |
| PI(36:4) -H                     | 857.7          | 857.522           | 857.519         | 3                  | 0.56 $\pm$ 0.04         |
| PS(42:8) -H                     | 858.6          | 858.526           | 858.529         | 3                  | 0.56 $\pm$ 0.04         |
| PA(44:8) -H                     | 799.6          | 799.535           | 799.528         | 9                  | 0.55 $\pm$ 0.07         |
| PS(44:8) -H                     | 886.5          | 886.557           | 886.56          | 3                  | 0.55 $\pm$ 0.06         |
| PI(40:5) -H                     | 911.7          | 911.571           | 911.566         | 5                  | 0.55 $\pm$ 0.06         |
| PI(36:3) -H                     | 859.6          | 859.542           | 859.534         | 9                  | 0.54 $\pm$ 0.06         |
| PI(36:2) -H                     | 861.6          | 861.554           | 861.55          | 5                  | 0.54 $\pm$ 0.06         |
| 16:2-Glc-Cholesterol -H         | 781.6          | 781.599           | 781.599         | 0                  | 0.54 $\pm$ 0.04         |
| PE(38:3p) -H                    | 752.6          | 752.564           | 752.56          | 5                  | 0.53 $\pm$ 0.06         |
| PI(38:3) -H                     | 887.6          | 887.559           | 887.566         | 8                  | 0.53 $\pm$ 0.04         |
| PI-Cer(34:0) +Na                | 820.6          | 820.53            | 820.531         | 1                  | 0.50 $\pm$ 0.06         |
| PC(38:7) +H                     | 804.6          | 804.556           | 804.554         | 2                  | 0.49 $\pm$ 0.07         |
| PS(40:5) -H                     | 836.6          | 836.551           | 836.545         | 7                  | 0.48 $\pm$ 0.18         |
| PC(40:7) +H                     | 832.6          | 832.588           | 832.585         | 4                  | 0.48 $\pm$ 0.07         |
| PA(O-20:0/22:4) +K              | 805.6          | 805.559           | 805.551         | 10                 | 0.42 $\pm$ 0.07         |
| PG(40:7) +H                     | 821.6          | 821.534           | 821.533         | 1                  | 0.39 $\pm$ 0.07         |
| PE(24:4/17:2) +H or PC(38:6) +H | 806.6          | 806.574           | 806.569         | 6                  | 0.35 $\pm$ 0.09         |



**Table S6.** Lipid mass signals co-localised with the hypocellular layer. Co-localisation coefficients (Pearson  $r$ ) are expressed as mean  $\pm$  standard error of the mean for four cases. TOF obs.  $m/z$  and FT-ICR obs.  $m/z$  refer to the experimentally observed  $m/z$  for the corresponding analyte per MALDI-TOF and FT-ICR, respectively. FT-ICR error denotes the difference (in ppm) between the observed accurate mass the predicted  $m/z$  of the assignment.

| Assignment                       | TOF obs. $m/z$ | FT-ICR obs. $m/z$ | Predicted $m/z$ | FT-ICR error (ppm) | Co-localisation ( $r$ ) |
|----------------------------------|----------------|-------------------|-----------------|--------------------|-------------------------|
| PE(36:4) -H                      | 738.6          | 738.51            | 738.508         | 3                  | 0.59 $\pm$ 0.04         |
| PE(38:5) -H                      | 764.6          | 764.527           | 764.524         | 4                  | 0.59 $\pm$ 0.03         |
| SM(35:1) -H or PE-Cer(38:1) -H   | 715.6          | 715.579           | 715.576         | 4                  | 0.58 $\pm$ 0.06         |
| PE(34:1) -H                      | 716.7          | 716.526           | 716.524         | 3                  | 0.58 $\pm$ 0.06         |
| GlcCer(32:1) -H                  | 670.7          | 670.52            | 670.526         | 9                  | 0.57 $\pm$ 0.11         |
| dMePE(32:0) -H                   | 718.6          | 718.542           | 718.539         | 4                  | 0.57 $\pm$ 0.04         |
| PI(38:5) -H                      | 883.7          | 883.539           | 883.534         | 6                  | 0.57 $\pm$ 0.04         |
| PE(36:2) -H                      | 742.7          | 742.543           | 742.539         | 5                  | 0.56 $\pm$ 0.05         |
| PA(35:1) -H                      | 687.6          | 687.499           | 687.497         | 3                  | 0.56 $\pm$ 0.03         |
| DG(22:5/22:6/0:0) -H             | 713.6          | 713.515           | 713.515         | 0                  | 0.56 $\pm$ 0.03         |
| PA(34:1) -H                      | 673.7          | 673.483           | 673.481         | 3                  | 0.53 $\pm$ 0.06         |
| PE(38:5p) -H                     | 748.7          | 748.532           | 748.529         | 4                  | 0.53 $\pm$ 0.02         |
| CerP(d18:1/18:0) -H              | 644.6          | 644.504           | 644.503         | 2                  | 0.52 $\pm$ 0.08         |
| PE(38:4p) -H                     | 750.6          | 750.547           | 750.544         | 4                  | 0.51 $\pm$ 0.07         |
| PE(34:2) -H                      | 714.7          | 714.51            | 714.508         | 3                  | 0.51 $\pm$ 0.03         |
| PC(33:1) -H or PE(36:1) -H       | 744.6          | 744.558           | 744.555         | 4                  | 0.51 $\pm$ 0.02         |
| GlcCer(30:1) -H                  | 642.5          | 642.489           | 642.495         | 9                  | 0.50 $\pm$ 0.12         |
| SM(d38:4) +H                     | 753.6          | 753.591           | 753.591         | 0                  | 0.45 $\pm$ 0.07         |
| SM(d36:1) +K or PE-Cer(d39:1) +K | 769.6          | 769.567           | 769.562         | 6                  | 0.45 $\pm$ 0.07         |
| PC(32:0e) +H                     | 720.8          | 720.594           | 720.59          | 6                  | 0.41 $\pm$ 0.04         |
| SM(d34:0) +H                     | 705.8          | 705.584           | 705.591         | 10                 | 0.39 $\pm$ 0.06         |
| SM(d36:1) +H                     | 731.6          | 731.61            | 731.606         | 5                  | 0.38 $\pm$ 0.13         |

**Table S7.** Lipid mass signals co-localised with the myelin layer. Co-localisation coefficients (Pearson *r*) are expressed as mean  $\pm$  standard error of the mean for four cases. TOF obs. *m/z* and FT-ICR obs. *m/z* refer to the experimentally observed *m/z* for the corresponding analyte per MALDI-TOF and FT-ICR, respectively. FT-ICR error denotes the difference (in ppm) between the observed accurate mass the predicted *m/z* of the assignment.

| Assignment                                               | TOF obs. <i>m/z</i> | FT-ICR obs. <i>m/z</i> | Predicted <i>m/z</i> | FT-ICR error (ppm) | Co-localisation ( <i>r</i> ) |
|----------------------------------------------------------|---------------------|------------------------|----------------------|--------------------|------------------------------|
| Sulfatide (3'-sulfo)Galbeta-Cer(d18:1/24:1(15Z)(2OH)) -H | 904.8               | 904.624                | 904.619              | 6                  | 0.76 $\pm$ 0.03              |
| Sulfatide (3'-sulfo)Galbeta-Cer(d18:1/24:0(2OH)) -H      | 906.7               | 906.639                | 906.635              | 4                  | 0.74 $\pm$ 0.04              |
| TG(58:1) -H                                              | 917.7               | 917.662                | 917.667              | 5                  | 0.73 $\pm$ 0.06              |
| Sulfatide (3'-sulfo)Galbeta-Cer(d18:1/24:1(15Z)) -H      | 888.7               | 888.628                | 888.624              | 5                  | 0.73 $\pm$ 0.04              |
| Sulfatide (3'-sulfo)Galbeta-Cer(d18:1/24:0) -H           | 890.8               | 890.645                | 890.64               | 6                  | 0.73 $\pm$ 0.04              |
| PS(39:4) -H                                              | 824.8               | 824.548                | 824.545              | 4                  | 0.73 $\pm$ 0.01              |
| Sulfatide (3'-sulfo)Galbeta-Cer(d18:1/22:0(2OH)) -H      | 878.8               | 878.608                | 878.603              | 6                  | 0.70 $\pm$ 0.06              |
| TG(18:4/18:4/20:5) -H                                    | 891.7               | 891.647                | 891.651              | 4                  | 0.69 $\pm$ 0.08              |
| PS(44:4) -H                                              | 894.7               | 894.629                | 894.623              | 7                  | 0.68 $\pm$ 0.07              |
| PG(44:5) -H                                              | 879.6               | 879.612                | 879.612              | 0                  | 0.63 $\pm$ 0.09              |
| PC(36:1) +H                                              | 788.7               | 788.621                | 788.616              | 6                  | 0.45 $\pm$ 0.15              |
| CL(78:0) +H                                              | 1550.2              | 1550.215               | 1550.199             | 10                 | 0.42 $\pm$ 0.17              |
| PG(O-20:0/22:0) +H                                       | 849.7               | 849.688                | 849.694              | 7                  | 0.39 $\pm$ 0.22              |
| TG(50:4) +K                                              | 865.7               | 865.662                | 865.668              | 7                  | 0.34 $\pm$ 0.14              |
| PC(32:1) +H                                              | 732.6               | 732.557                | 732.554              | 4                  | 0.33 $\pm$ 0.16              |
| TG(18:4/18:4/18:4) +H                                    | 867.7               | 867.656                | 867.65               | 7                  | 0.33 $\pm$ 0.11              |
